# Supplementary material
Source: PubMed Central journal article supplement (PMC5440016)

SUPPLEMENTARY DATA

**Supplementary Figure 1. Altered morphology in the Arcuate of HIF-1 $\alpha$ <sup>EC</sup> mice. A) Representative images of vessels in close proximity to POMC neurons. c) Quantification of vessels in the proximity of POMC neurons from HIF-1 $\alpha$ <sup>EC</sup> mice and their control littermates. Scale bars = 50  $\mu$ m**

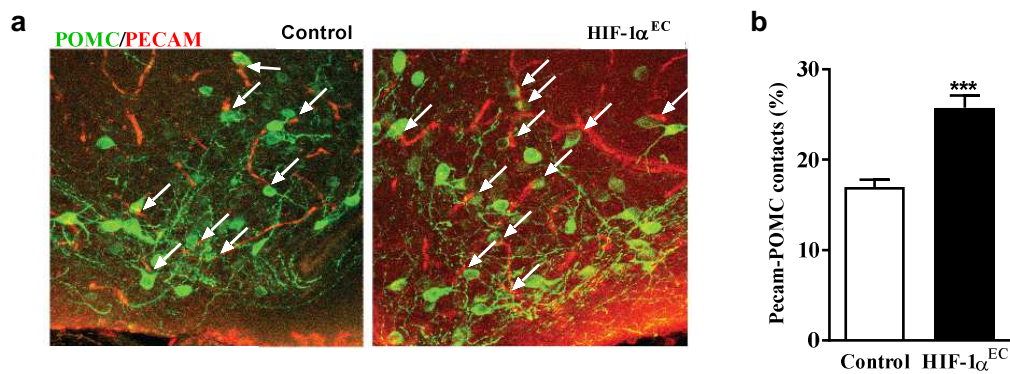

SUPPLEMENTARY DATA

**Supplementary Figure 2. Body composition of HIF-1 $\alpha^{EC}$  mice.** a) Fat mass and b) Lean mass percentage HIF-1 $\alpha^{EC}$  mice and their control littermates. c) Representative images of PECAM in the Arc of wild-type mice in fed and fasted condition. Scale bars = 50  $\mu$ m

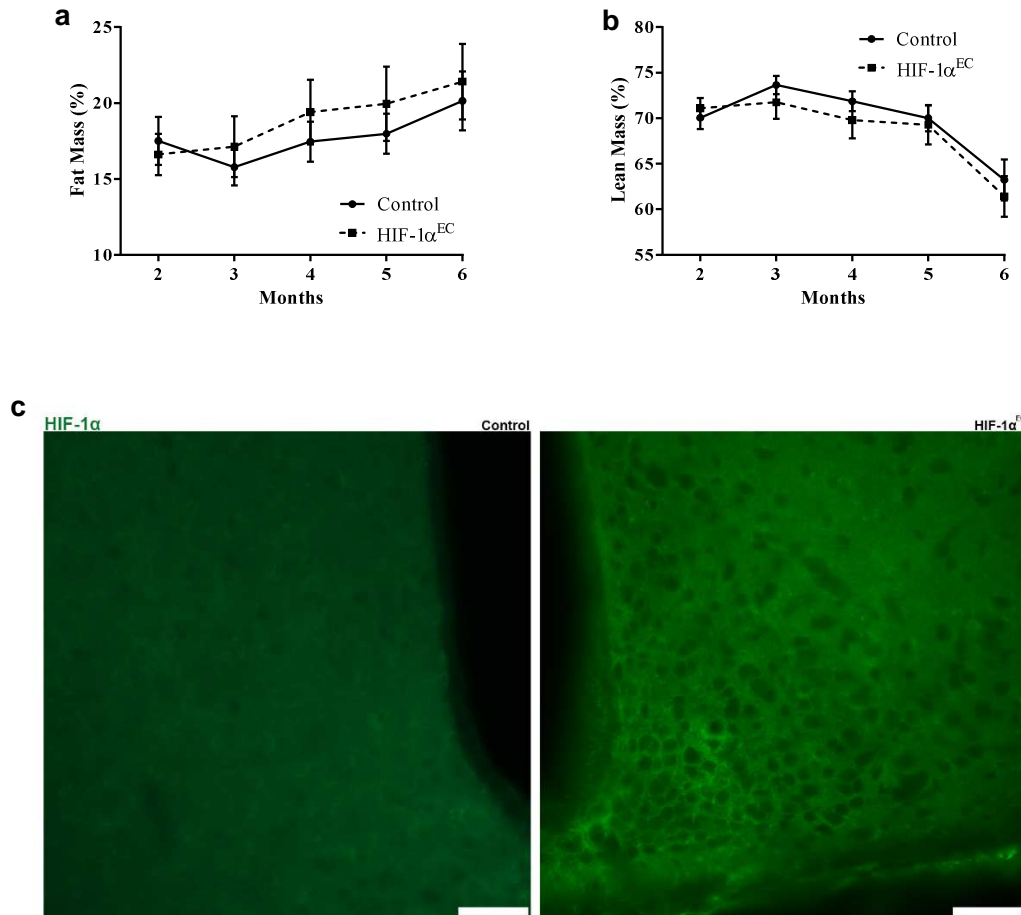

SUPPLEMENTARY DATA

**Supplementary Figure 3. Frequency of synaptic events onto POMC cells.** Frequency of mEPSC onto POMC neurons of a) Control and b) HIF-1 $\alpha^{EC}$  mice in fed and fasted condition. Frequency of mIPSC onto POMC neurons of a) Control and b) HIF-1 $\alpha^{EC}$  mice in fed and fasted condition.

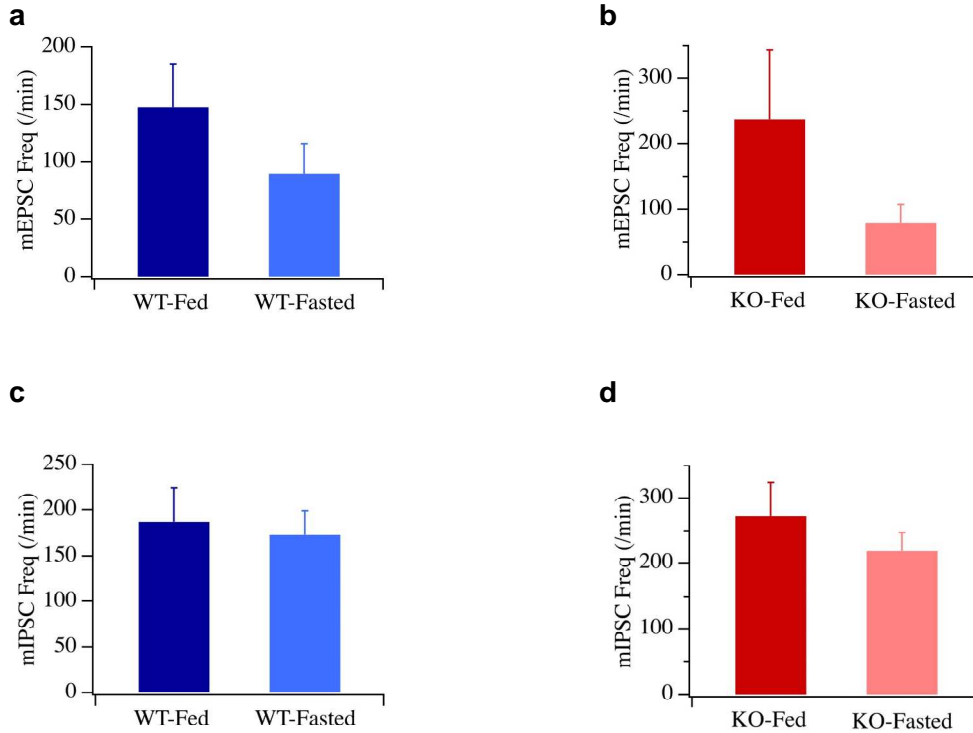

Supplement: DB161106SupplementaryData.pdf [file DB161106SupplementaryData.pdf]
